# Supplementary material for: A mutation in the POT1 gene is responsible for cardiac angiosarcoma in TP53-negative Li–Fraumeni-like families
Source: PubMed Central journal article supplement (PMC4598567; doi:10.1038/ncomms9383), 2015-09-25
Supplement: ncomms9383-s1.pdf [file ncomms9383-s1.pdf]

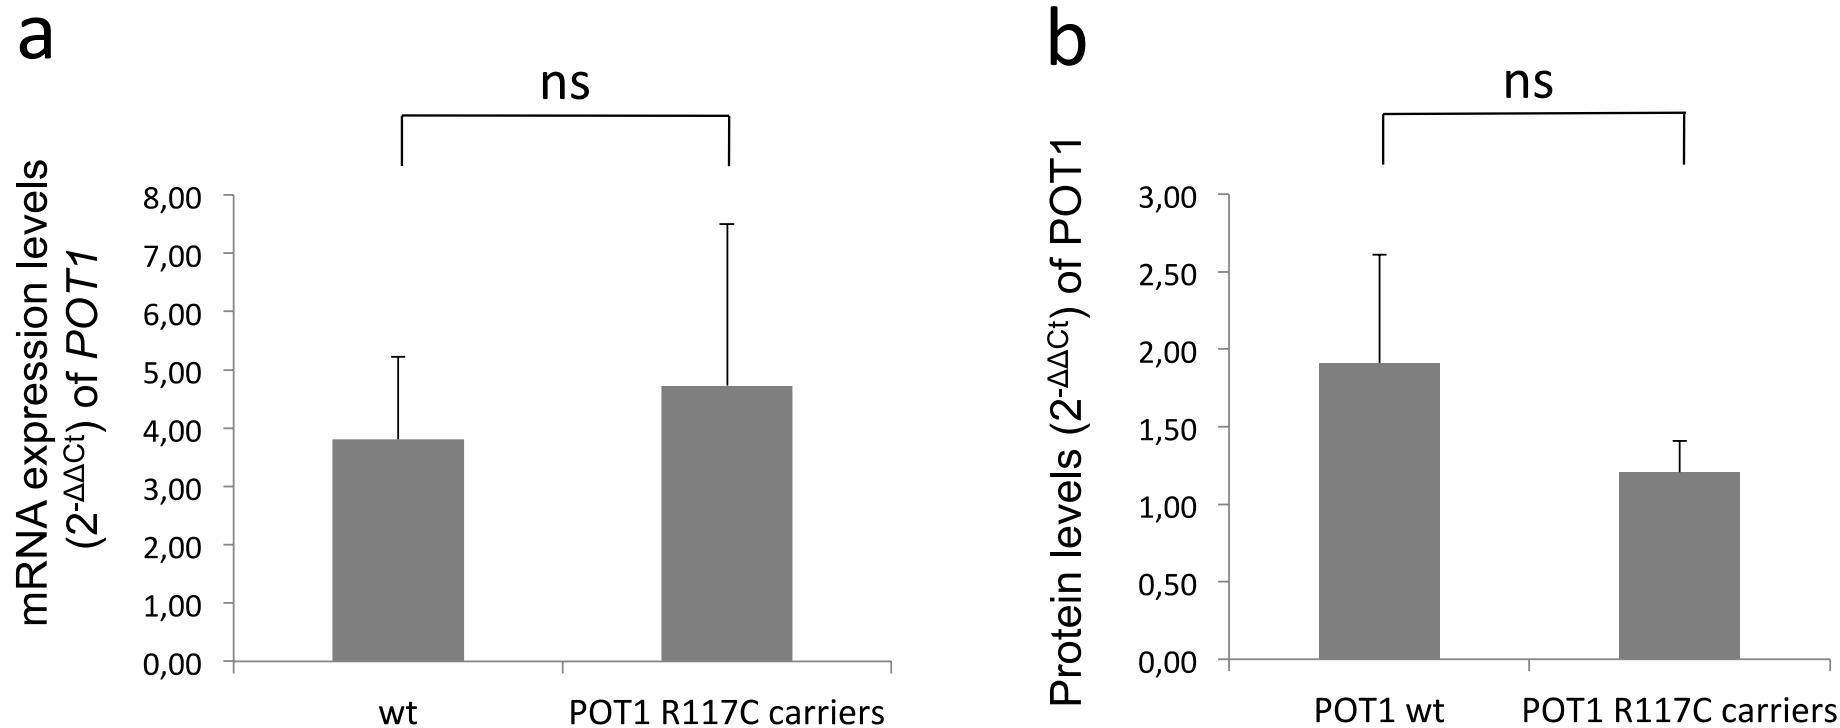

**Supplementary Figure 1:** Analyses of family 1 members. The T-student's t –test was used for the statistical analysis of normal distributed values. a) Comparison of mRNA expression levels between *POT1* wild type (wt) and p.R117C mutation carriers. normalized with *GAPDH* as control b) Values of *POT1* protein levels for several members of family 1 (n=7) normalized for *GAPDH* control . There was a trend towards decreased *POT1* levels in mutation carriers ( $1.91 \pm 0.69$ ) compared with non-carriers ( $1.21 \pm 0.2$ ) ( $p=0.1$ ).

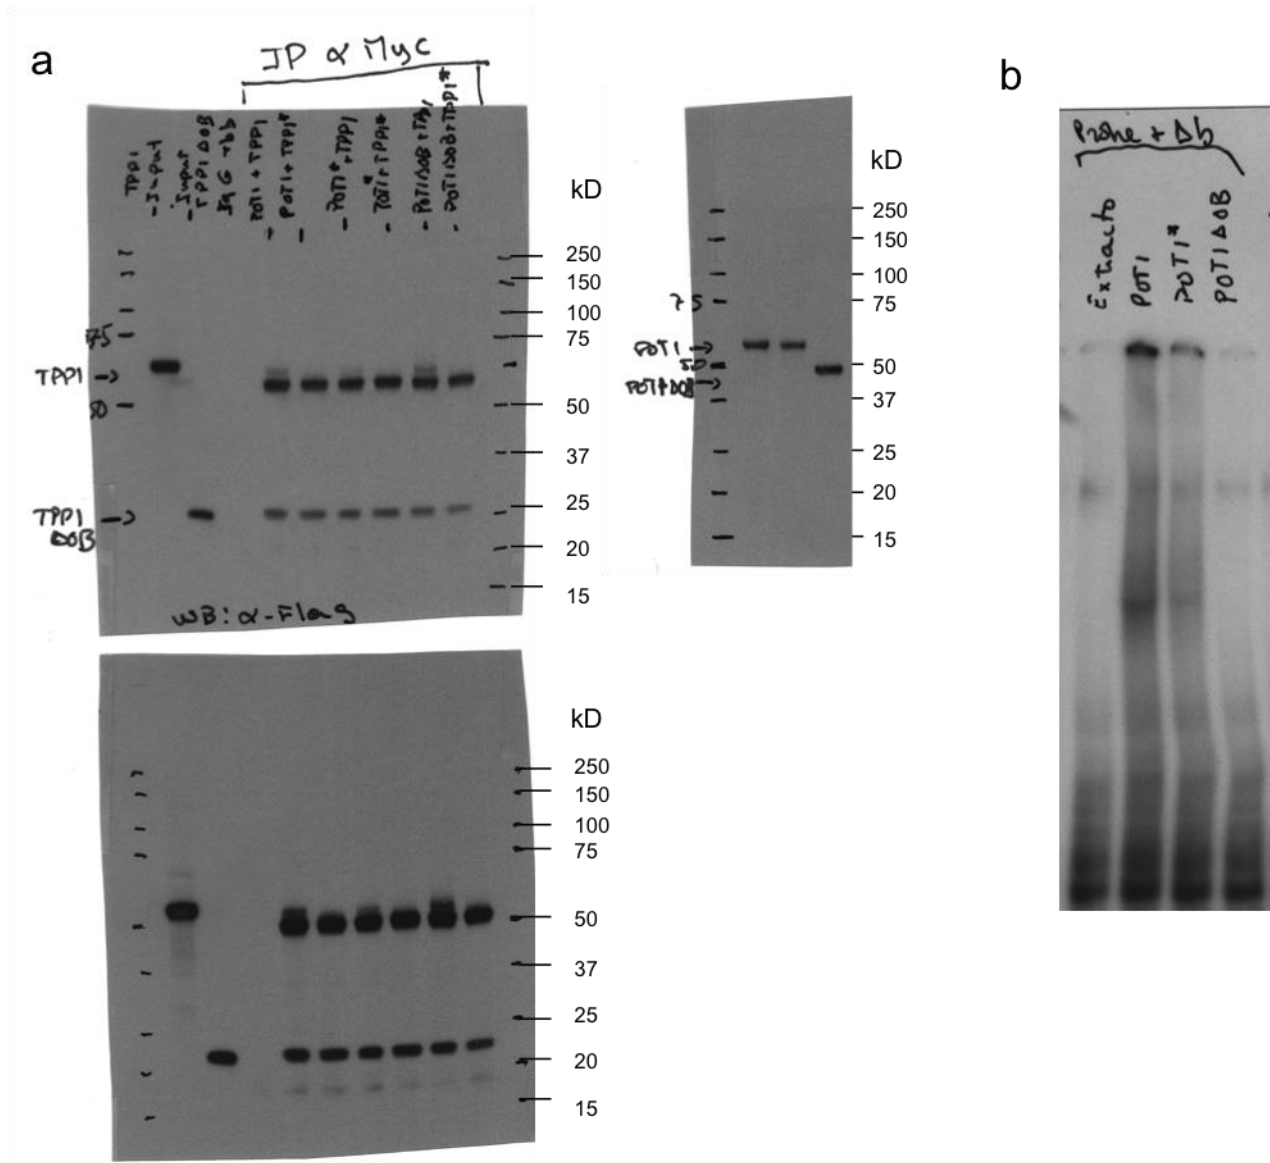

**Supplementary Figure 2:** Uncropped scans of the gels/blots. (a) Western blots presented in Figure 3d and (b) of the electrophoretic mobility shift assay (EMSA) presented in Figure 3e. The molecular weight ladder is shown to the right of each blot.

**Supplementary Table 1:** Candidate variants to study further segregation in members of family 1.

| Prioritization Criteria | Variant position | GENE          | Protein change | Function                                                                      | Tissue expression | COSMIC/Pathology/                          |
|-------------------------|------------------|---------------|----------------|-------------------------------------------------------------------------------|-------------------|--------------------------------------------|
|                         | chr1:1238583     | <i>ACAP3</i>  | Arg62Cys       | arf-GAP with coiled-coil, ANK repeat and PH domain-containing protein 3       | Lung              | COSM527726                                 |
| Described in COSMIC     | chr15:71535077   | <i>THSD4</i>  | Thr185Met      | A disintegrin and metalloproteinase with thrombospondin motifs-like protein 6 | Lung              | COSM555837                                 |
|                         | chr7:5112796     | <i>RBAK</i>   | Leu227Phe      | RB-associated KRAB zinc finger protein                                        |                   | pleomorphic sarcoma (RB1)                  |
| Function Related        | chr7:124503601   | <i>POT1</i>   | Arg117Cys      | Telomere end-binding protein                                                  | Blood/nervous     | Gastric carcinoma, melanoma, glioma        |
|                         | chr2:37347280    | <i>EIF2AK</i> | Ser316*        | Apoptosis                                                                     |                   | <i>p53</i> related                         |
|                         | chr7:151945007   | <i>MLL3</i>   | Gly838Ser      | Lysine N-methyltransferase 2C                                                 | Muscular          | myeloid/lymphoid or mixed-lineage leukemia |
| Tissue Related          | chr5:79030433    | <i>CYMA5</i>  | His1949Tyr     |                                                                               | Cardiac           |                                            |
|                         | chr2:220355477   | <i>SPEG</i>   | Val3062Leu     | Differentiation                                                               | Aortic            |                                            |
|                         | chr1:161721670   | <i>DUSP12</i> | Phe158Ser      | Protein-tyrosine phosphatase                                                  |                   |                                            |
|                         | chr10:81932595   | <i>ANXA11</i> | Phe8Leu        | Annexin                                                                       |                   |                                            |

\*Stop codon

**Supplementary Table 2:** Haplotype frequency study for families 1 and 2.

| SNP        | Position  | Annotation | MAF  | 1*    | 2     | 3    | 4    | 5    | 6    |
|------------|-----------|------------|------|-------|-------|------|------|------|------|
| rs67585224 | 124537476 | Intron 1   | 0.21 | A     | C     | A    | A    | A    | C    |
| rs68091803 | 124526331 | Intron 2   | 0.20 | T     | T     | T    | T    | T    | T    |
| rs7784168  | 124492038 | Intron 6   | 0.28 | C     | C     | T    | T    | T    | T    |
| rs7801661  | 124483222 | Intron 8   | 0.21 | T     | C     | T    | T    | T    | T    |
| rs35536751 | 124481185 | Exon10     | 0.01 | C     | C     | C    | C    | C    | C    |
| rs17246404 | 124462661 | 3'UTR      | 0.20 | C     | T     | C    | T    | C    | T    |
| rs76436625 | 124462655 | 3UTR       | 0.12 | T     | T     | T    | T    | C    | T    |
| Frequency  |           |            |      | 42.0% | 21.1% | 7.7% | 7.7% | 3.3% | 2.2% |

\* Unique haplotype found in different members of families 1 and 2.

MAF: Minor Allele Frequency.

**Supplementary Table 3:** In silico PACC score of aa annotated in the OB fold and described stacking to DNA (T1-G10) <sup>14</sup> for POT1 proteins with mutations within OB1 domain (Categorization is shown in brackets).

| Interaction | Position (aa) | WT     | p.Y89>C | p.Q94>G | p.G95>C | p.R117>C | p.R137>H | OBDelta* | OBDelta** |
|-------------|---------------|--------|---------|---------|---------|----------|----------|----------|-----------|
| OB fold     | 146           | 122(E) | 122(E)  | 122(E)  | 122(E)  | 122(E)   | 122(E)   | 122(E)   | 97(E)     |
|             | 147           | 93(E)  | 117(E)  | 93(E)   | 93(E)   | 93(E)    | 117(E)   | 117(E)   | 93(E)     |
|             | 148           | 45(I)  | 45(I)   | 45(I)   | 45(I)   | 45(I)    | 45(I)    | 95(E)    | 45(I)     |
|             | 149           | 59(E)  | 59(E)   | 79(E)   | 59(E)   | 59(E)    | 59(E)    | 59(E)    | 59(E)     |
|             | 150           | 19(I)  | 9(B)    | 19(I)   | 9(B)    | 9(B)     | 9(B)     | 9(B)     | 9(B)      |
|             | 151           | 32(I)  | 32(I)   | 32(I)   | 32(I)   | 61(I)    | 9(B)     | 19(I)    | 49(I)     |
|             | 152           | 86(E)  | 86(E)   | 86(E)   | 86(E)   | 0(B)     | 61(I)    | 86(E)    | 86(E)     |
| T1; T2      | 62            | 0(B)   | 0(B)    | 0(B)    | 0(B)    | 0(B)     | 0(B)     | -        | -         |
| A3; G4      | 89            | 26(I)  | 16(I)   | 26(I)   | 26(I)   | 26(I)    | 26(I)    | -        | -         |
| G5; G6      | 31            | 0(B)   | 0(B)    | 0(B)    | 0(B)    | 0(B)     | 0(B)     | -        | -         |
| T7          | 271           | 26(I)  | 26(I)   | 26(I)   | 26(I)   | 26(I)    | 26(I)    | 66(I)    | 66(I)     |
|             | 161           | 0(B)   | 0(B)    | 0(B)    | 0(B)    | 0(B)     | 0(B)     | 0(B)     | 0(B)      |
|             | 245           | 0(B)   | 0(B)    | 0(B)    | 0(B)    | 0(B)     | 0(B)     | 0(B)     | 0(B)      |
| T8; A9      | 266           | 36(I)  | 0(B)    | 36(I)   | 22(I)   | 0(B)     | 0(B)     | 55(I)    | 22(I)     |
| G10         | 223           | 0(B)   | 0(B)    | 0(B)    | 0(B)    | 0(B)     | 0(B)     | 0(B)     | 0(B)      |

\*: 1-126 deletion; \*\*: 10-141 deletion; (E): Exposed; (I): Intermediate; (B): Buried

Highlighted in grey: Most significant changes

**Supplementary Table 4:** In silico protein-protein interaction score for positions with significant acceptance in wt POT1 (threshold >20) for POT1 proteins with mutations within OB1 domain.

| Position (aa) | WT | p.Y89>C | p.Q94>G | p.G95>C | p.R117>C | p.R137>H | OBDelta* | OBDelta** |
|---------------|----|---------|---------|---------|----------|----------|----------|-----------|
| 1 (M)         | 26 | 26      | 26      | 26      | 28       | 24       | NA       | 19        |
| 2 (S)         | 30 | 31      | 26      | 30      | 27       | 24       | NA       | 10        |
| 3 (L)         | 27 | 25      | 25      | 28      | 25       | 21       | NA       | -23       |
| 39 (K)        | 26 | 24      | 24      | 24      | 24       | 22       | NA       | NA        |
| 91 (K)        | 26 | 29      | 29      | 28      | 31       | 29       | NA       | NA        |
| 253 (S)       | 33 | 28      | 35      | 34      | 30       | 36       | 38       | 32        |
| 254 (E)       | 28 | 19      | 24      | 25      | 31       | 31       | 21       | 28        |
| 255 (N)       | 34 | 23      | 26      | 28      | 36       | 36       | 29       | 38        |
| 341 (Q)       | 23 | 23      | 15      | 13      | 21       | 28       | 23       | 19        |
| 363 (R)       | 47 | 48      | 47      | 48      | 47       | 49       | 49       | 42        |
| 427 (K)       | 23 | 21      | 23      | 29      | 20       | 26       | 10       | 10        |
| 428 (N)       | 23 | 17      | 20      | 23      | 17       | 22       | 10       | 6         |
| 499 (H)       | 21 | 19      | 16      | 20      | -24      | 15       | 18       | -23       |
| 599 (A)       | 28 | 23      | 17      | 23      | 24       | 28       | 23       | 19        |

\*: 1-126 deletion; \*\*: 10-141 deletion; NA: Not applicable

Highlighted in grey: Most significant changes

**Supplementary Table 5:** Primers used for variant validation and further segregation and for *POT1* gene and haplotype studies.

| Gene          | Position of the variant | Forward              | Reverse               | T°C | Product size (bp) |
|---------------|-------------------------|----------------------|-----------------------|-----|-------------------|
| <i>ACAP3</i>  | chr1:1238583            | GCTGGTGAAGCTGTGCAGT  | GTAGGCTGTCAGCGAACCTC  | 57  | 338               |
| <i>THSD4</i>  | chr15:71535077          | CCCTGGCAAGTATGGCTATG | ACTTGAAGCTGCAGGGTAGC  | 64  | 286               |
| <i>RBAK</i>   | chr7:5112796            | TTCTAGCCAGCACCAGGAAG | CCCAAAAGGAAACAGCACCT  | 64  | 364               |
| <i>POT1</i>   | chr7:124503601          | AATGATGCTCCGTCCACTTC | TGGTTCGTAGGTTGTGCATC  | 64  | 351               |
| <i>EIF2AK</i> | chr2:37347280           | ATGTTGGCCAGACTGGTTTC | CCGGAGTAGCTGGGACTACA  | 64  | 609               |
| <i>MLL3</i>   | chr7:151945007          | TCAGTCACTCCAAAAATTGG | TGGCATTCTTCATTAACAGCA | 65  | 260               |
| <i>CYMA5</i>  | chr5:79030433           | GATGTTGGGAAAGCCAGAAA | GAATCTCCTTCCCCTCTGCT  | 59  | 350               |
| <i>SPEG</i>   | chr2:220355477          | GCCACACTCCAGGGTTATTG | AAGATCGTGCCTATGCTG    | 64  | 245               |
| <i>DUSP12</i> | chr1:161721670          | TGCAGGAGTCAGTCGAAGTG | TCTCAGGGATTGCTGGAAGT  | 64  | 405               |
| <i>ANXA11</i> | chr10:81932595          | GAGGAGGGGAGTGAGGAAAC | CACCAGCAGGAGACAGTGAA  | 64  | 326               |

  

| Gene        | EXON                      | Forward                    | Reverse                     | T°C | Product size (bp) |
|-------------|---------------------------|----------------------------|-----------------------------|-----|-------------------|
| <i>POT1</i> | 1                         | TTAGGCTGGAGATGGGTAAAA      | CACATGTATCTATGTGTGTGGCATA   | 60  | 589               |
|             | 2.1                       | CATGGATTTGCTGCTAATATGAT    | AATGCATTTCCACTCCAAAAA       | 58  | 246               |
|             | 2.2                       | AATTGTACCATTTATAAAACAAGTTC | GCATCAGTGTGTTTGGCAAT        | 58  | 451               |
|             | 3                         | TGCTTTAAAAATATTGAAAGTCAGG  | CAGTGAACAATACAGAGTTCTCTTCAA | 58  | 238               |
|             | 4                         | TGGTTCGTAGGTTGTGCATC       | GGTGCTAACTTATAATTCCCAGTA    | 58  | 400               |
|             | 5                         | TTTTTCAAAGGATCATAAACTACTC  | AAAAATTGCTCTAACCCTTAAG      | 58  | 398               |
|             | 6                         | CCACTTTCTAAATAACAAATGATCT  | TCGGCTTAATCGATACCTTA        | 58  | 250               |
|             | 7                         | TCTGGATTTTGTGGGTAGAGC      | AGCAAGAATAACTGTCAATGTT      | 58  | 199               |
|             | 8                         | AGCAACGCTCCATTGTTTTTC      | TGCTCATTACTGTGCCCATC        | 58  | 175               |
|             | 9                         | GCCTAGCGTAATATTTTCTTAGC    | CGTTTGTTTTATTATGAAAATACTCA  | 60  | 500               |
|             | 10                        | TCACGCTTACACCAAAATCG       | GCAAAAGGAGTATTCTAACAAAACA   | 58  | 300               |
|             | 11                        | CATTTTATTTGCACTACTTGAAGG   | AGCATGACCCCAAGACTT          | 60  | 248               |
|             | 12                        | GCAGTAAAAAGTTATAACAAACAAGC | TCTGAATTGGCCAAACAACAT       | 60  | 494               |
|             | 13                        | GCAGACTCATATGGTTTGATCTTTT  | TCCTTTTAGGAACAAAGCAGGT      | 60  | 224               |
|             | 14                        | TTTTGGAGTTGAGACCAGCA       | GGGATTGTTAAAATATTCTTGCCTAC  | 60  | 298               |
| 15          | CAGAGTTATTTATTTTGTTTAATGG | AAACTCAGGTCAGGAAAAGA       | 60                          | 250 |                   |

  

| Gene        | Position of the SNP | Forward                    | Reverse                    | T°C | Product size (bp) |
|-------------|---------------------|----------------------------|----------------------------|-----|-------------------|
| <i>POT1</i> | rs67585224          | TCCTGAGAACTGTCCTGAGAACT    | AAAATATTCAAATTCCTAGGATGACA | 57  | 205               |
|             | rs68091803          | AGCCATGGGGAACAAGAATA       | TTTTCACGAAAAATTCTAGCTAATGA | 57  | 586               |
|             | rs7784168           | TCTGGATTTTGTGGGTAGAGC      | AGCAAGAATAACTGTCAATGTT     | 58  | 199               |
|             | rs7801661           | GCCTAGCGTAATATTTTCTTAGC    | CGTTTGTTTTATTATGAAAATACTCA | 62  | 500               |
|             | rs35536751          | TCACGCTTACACCAAAATCG       | GCAAAAGGAGTATTCTAACAAAACA  | 58  | 300               |
|             | rs17246404          | AGAATATAGACTCTTGGTTCAAACAT | CTTCTAGATTGAGGGCTTCCTG     | 57  | 150               |
|             | rs76436625          |                            |                            |     |                   |

**Supplementary Table 6:** Characteristics of the antibodies used for Western blotting and FISH studies.

| Antibody         | Reference                      | Clone             | Working Concentrations |       |
|------------------|--------------------------------|-------------------|------------------------|-------|
|                  |                                |                   | WB                     | IF    |
| POT1*            | Novus Biologicals: NB500-176   | Rabbit Polyclonal | 1:500                  | 1:250 |
| GAPDH            | Homemade, CNIO                 | Monoclonal        | 1:500                  | -     |
| TRF2*            | Cell Signaling, #2645          | Rabbit Polyclonal | -                      | -     |
| TRF1             | Homemade, CNIO                 | Rabbit Polyclonal | -                      | 1:250 |
| TRF1*            | (TRF-78) (ab10579), ABCAM      | Mouse monoclonal  | -                      | 1:250 |
| $\gamma$ H2AX    | Millipore, #05-636             | Mouse Monoclonal  | -                      | 1:250 |
| 555-Alexa-donkey | Life technologies, A31572      |                   | -                      | 1:400 |
| 488-Alexa-goat   | Life technologies, A11017      |                   | -                      | 1:400 |
| FLAG             | F3166 SIGMA                    | Mouse monoclonal  | 1:1000                 | -     |
| c-MYC (9E10)     | C-40, Santa Cruz Biotechnology | Mouse monoclonal  | 1:1000                 | 1:500 |

\*: 4  $\mu$ L of antibody were used per IP Chip reaction; WB: Western Blot; IF: Immunofluorescence
